# Supplementary material
Source: PubMed Central journal article supplement (PMC2884081)

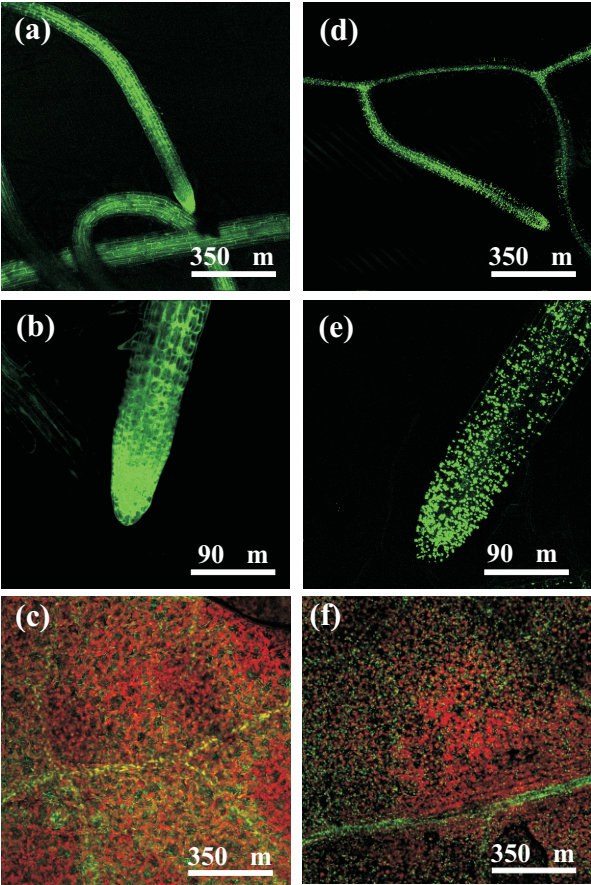

FIGURE S1

Supplement: NIHMS187802-supplement-Supp_Fig_1.pdf [file NIHMS187802-supplement-Supp_Fig_1.pdf]

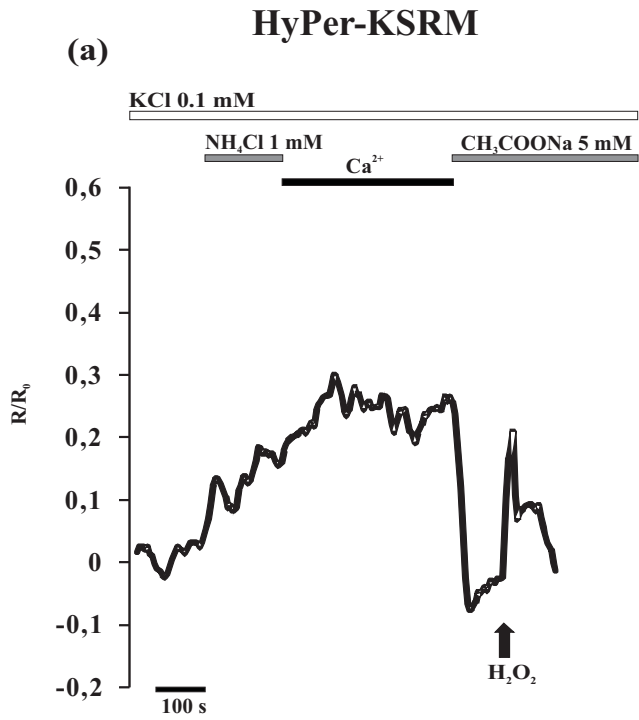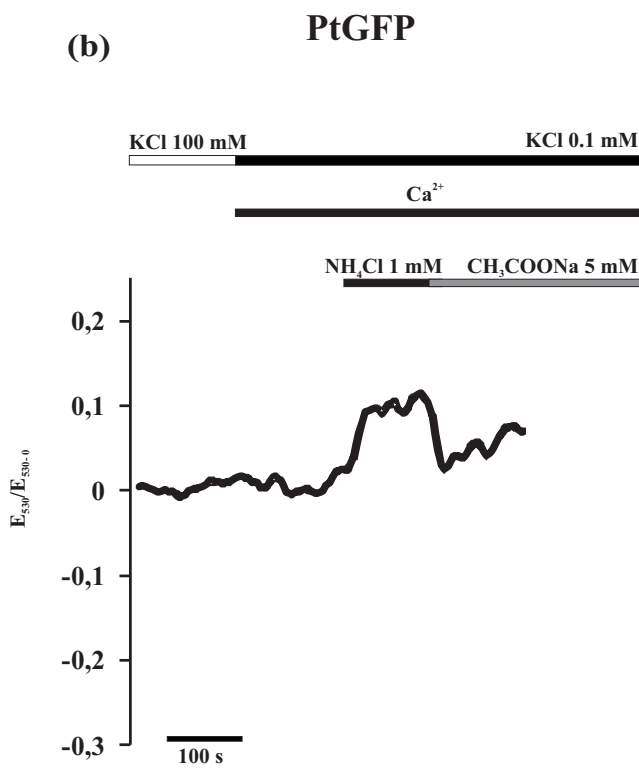

**FIGURE S2**

Supplement: NIHMS187802-supplement-Supp_Fig_2.pdf [file NIHMS187802-supplement-Supp_Fig_2.pdf]
